# Supplementary material for: Structure–chiroptical property relationship of kinetically labile camphor-derivative β-diketone Yb(iii) complexes: do the adducts coexist as diastereomers or not?
Source: Royal Society of Chemistry journal article supplement (doi:10.1039/c1nj20430k), 2011-01-01

## Electronic Supplementary Information

### Structure-chiroptical property relationship of kinetically labile camphor-derivative $\beta$ -diketone Yb(III) complexes: The adducts coexist as diastereomers or not?

Yiji Lin,<sup>a</sup> Shigang Wan,<sup>a</sup> Fang Zou,<sup>a</sup> Yuekui Wang<sup>\*b</sup> and Hui Zhang<sup>\*a</sup>

<sup>a</sup> State Key Laboratory of Physical Chemistry of Solid Surface and Department of Chemistry, College of Chemistry and Chemical Engineering, Xiamen University, Xiamen 361005, China.

<sup>b</sup> Key Laboratory of Chemical Biology and Molecular Engineering of the Education Ministry, Institute of Molecular Science, Shanxi University, Taiyuan 030006, China.

**Figure S1.** The coordination polyhedra of complexes **I** and **II**.

**Figure S2.** The observed and simulated X-ray diffraction patterns of complex **I**.

**Figure S3.** The observed and simulated X-ray diffraction patterns of complex **III**.

**Figure S4.** The bulk sample solid-state CD spectra of complexes **I** and **II**.

**Figure S5.** Solid-state electronic absorption spectrum of complex **I**.

**Figure S6.** Solid-state electronic absorption spectrum of complex **III**.

**Figure S7.** Solution electronic absorption spectrum of complex **I**.

**Figure S8.** Solution electronic absorption spectrum of complex **III**.

**Figure S9.** ORTEP structures of complexes **I** and **II**.

**Figure S10.** ORTEP structures of complexes **III** and **IV**.

**Figure S1.** The coordination polyhedra of complexes I and II.

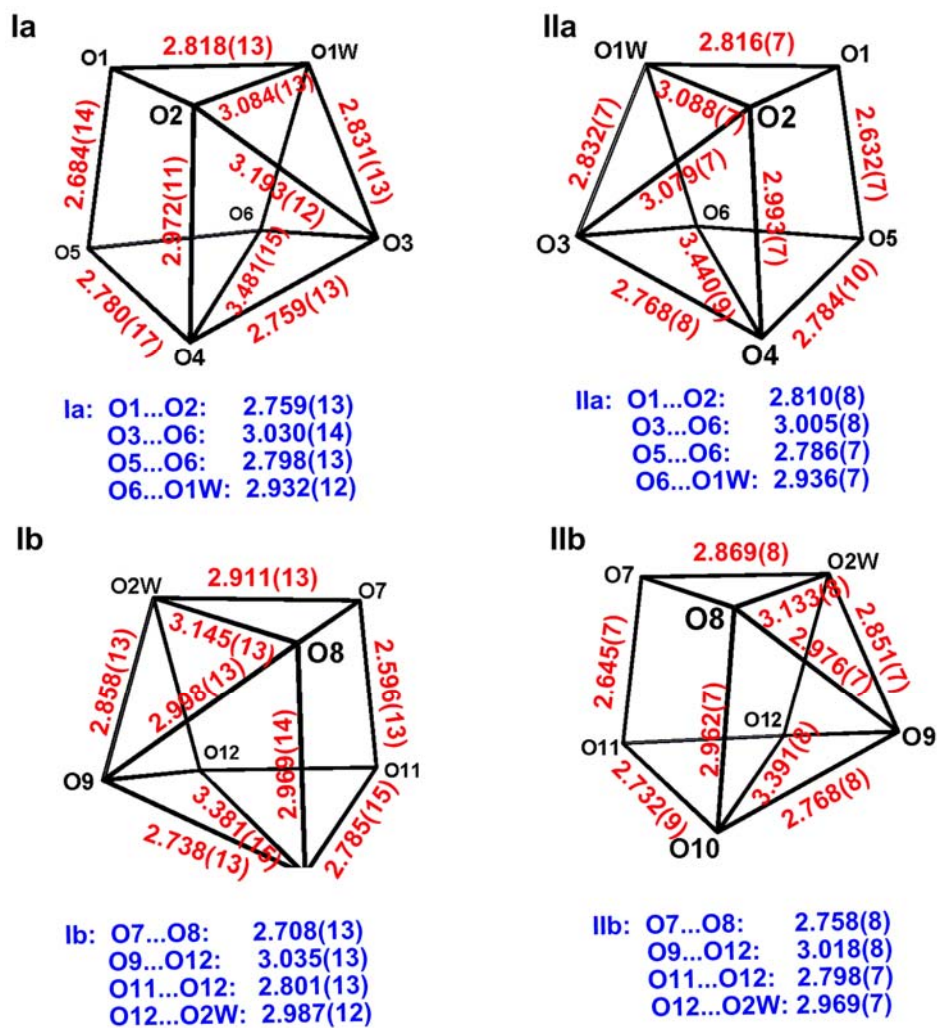

**Figure S2.** The observed (red) and simulated (black) X-ray powder diffraction spectra of complex **I**.

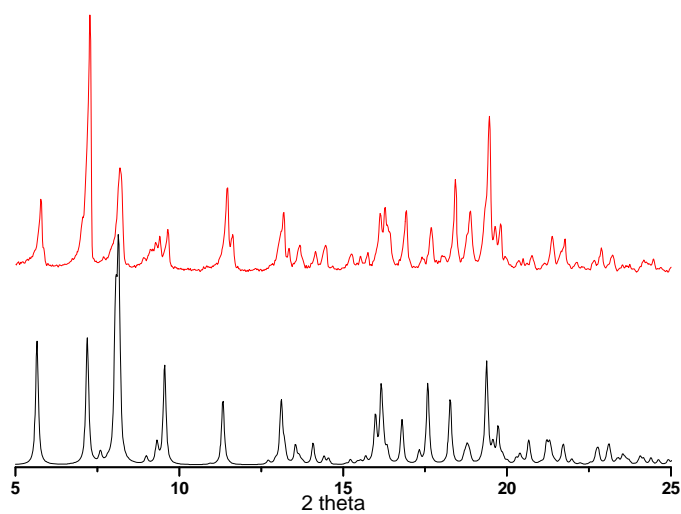

**Figure S3.** The observed (red) and simulated (black) X-ray powder diffraction spectra of complex **III**.

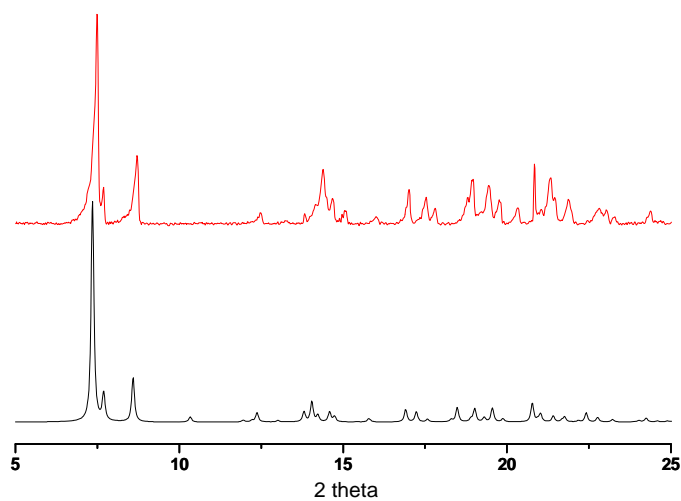

**Figure S4.** Solid-state CD spectra of the bulk samples **I** and **II** (black: **I**; red: **II**).

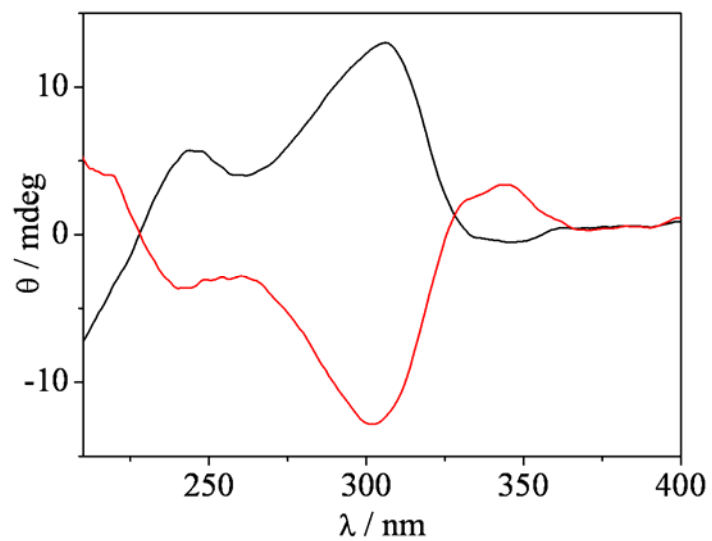

**Figure S5.** Solid-state absorption spectrum of complex **I**.

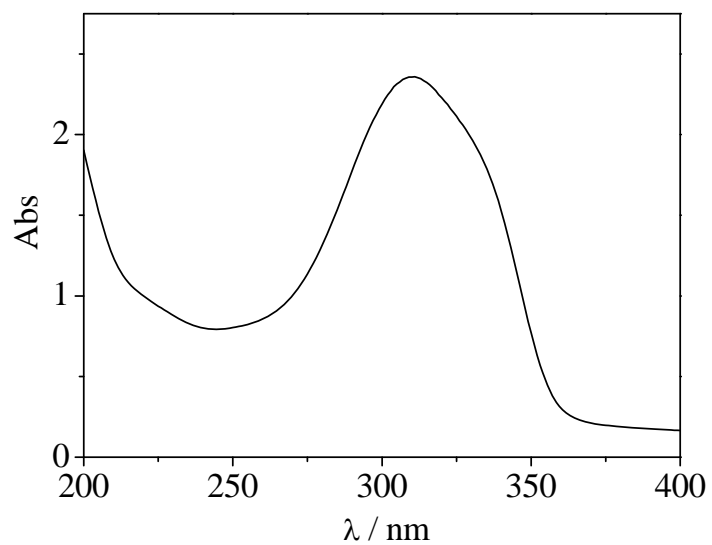

**Figure S6.** Solid-state absorption spectrum of complex **III**.

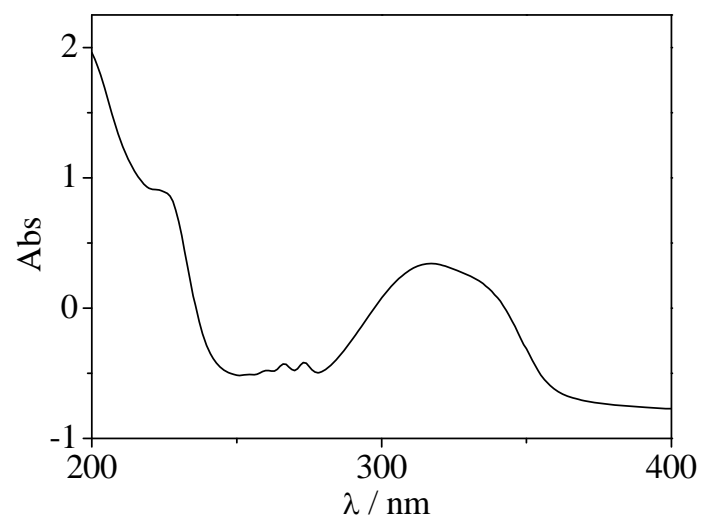

**Figure S7.** Solution absorption spectrum of complex **I**.

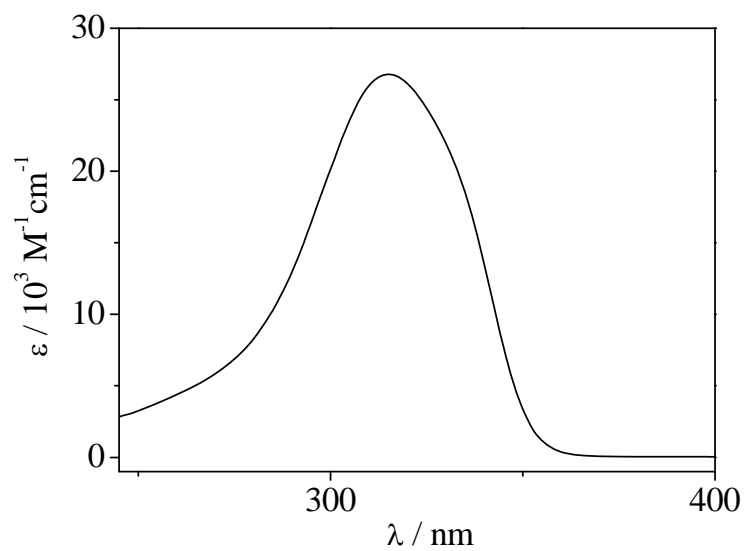

**Figure S8.** Solution absorption spectrum of complex **III**.

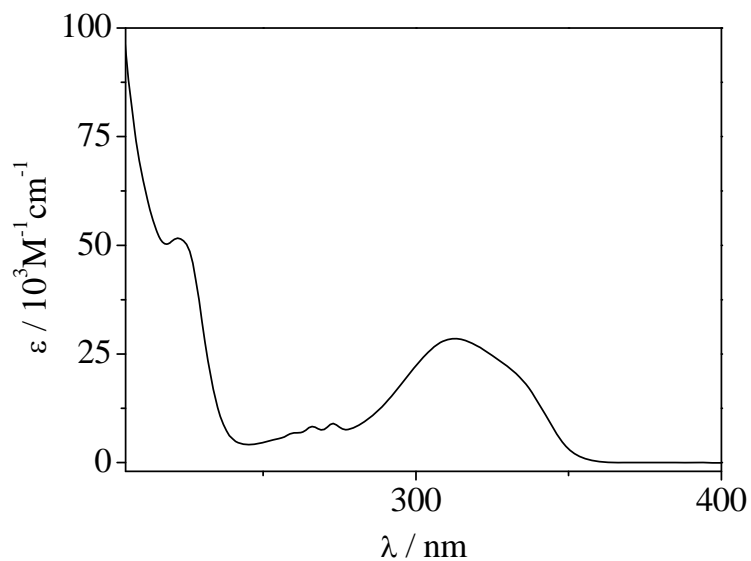

**Figure S9.** ORTEP structure of complexes **I** and **II** ( $-\text{C}_3\text{F}_7$  groups are omitted for clarity). Thermal ellipsoids are shown at the 30% probability level.

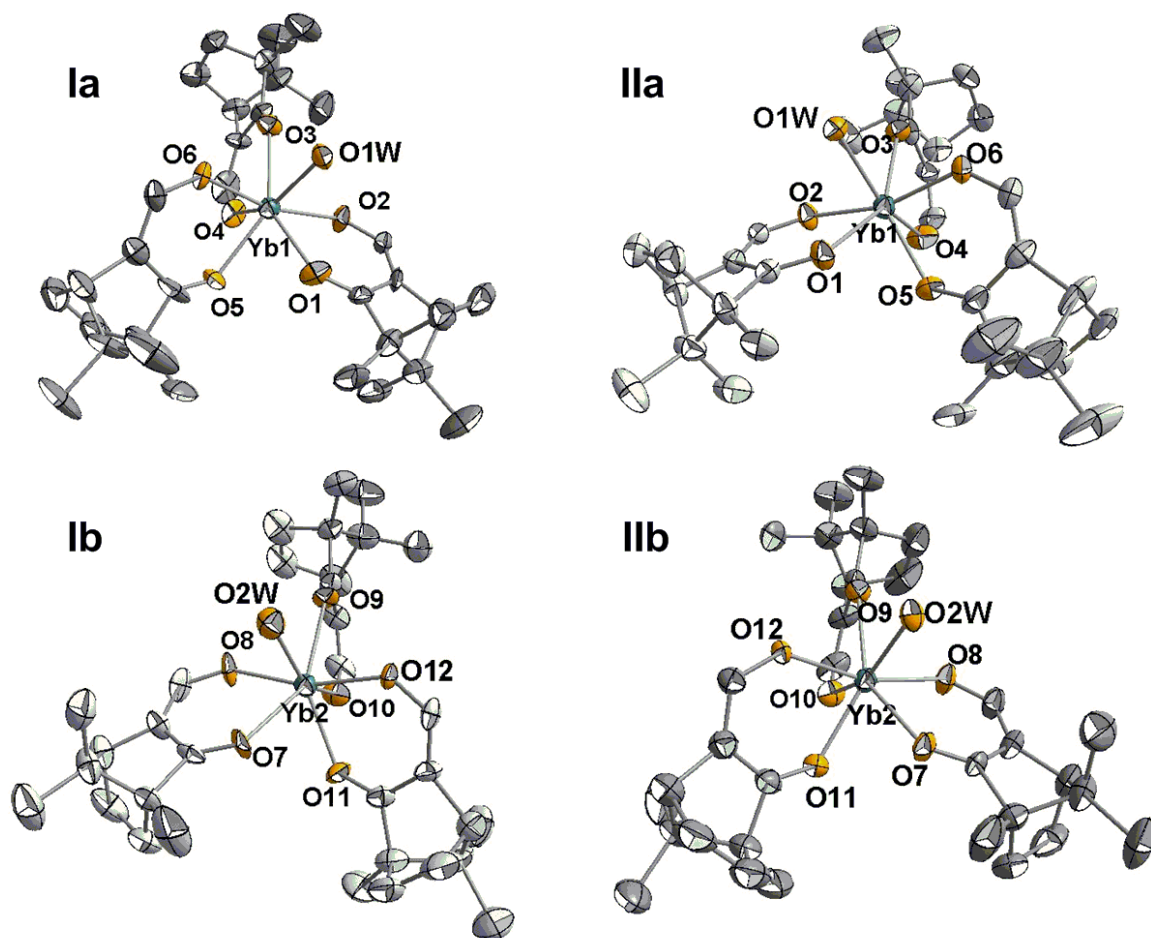

**Figure S10.** ORTEP structure of complexes **III** (left) and **IV** (right) ( $-\text{C}_3\text{F}_7$  groups are omitted for clarity). Thermal ellipsoids are shown at the 30% probability level.

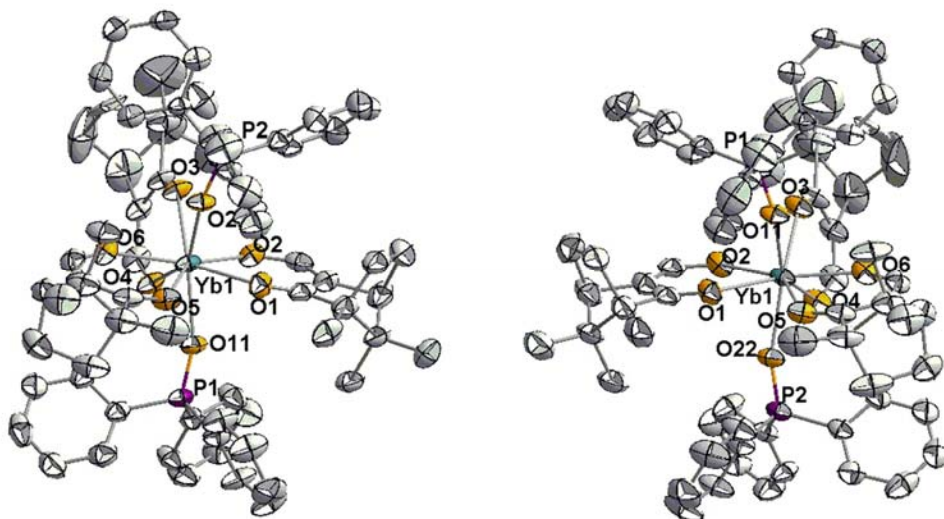

Supplement: c1nj20430k.pdf [file c1nj20430k.pdf]
